# Supplementary material
Source: Springer Nature journal article supplement (https://www.springermedizin.de/resource/supplementary/12968_2009_940_MOESM4_ESM.pdf/9580152)

Direct Flow

$35 \pm 6\%$

Residual Volume

$33 \pm 4\%$

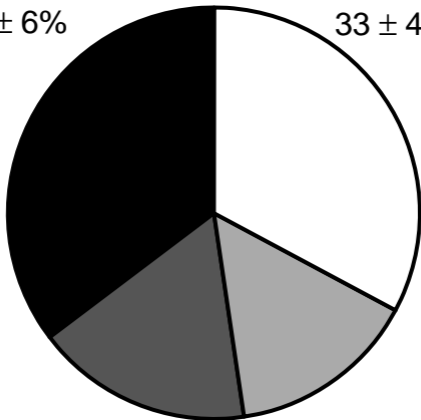

Retained Inflow

$17 \pm 4\%$

Delayed Ejection Flow

$15 \pm 3\%$

Supplement: MOESM4 [file 9580152]
